# Supplementary material for: Promotional effect of Sn additive on the chlorine resistance over SnMnOx/LDO catalysts for synergistic removal of NOx and o-DCB
Source: Royal Society of Chemistry journal article supplement (doi:10.1039/d2cy00114d), 2022-01-01
Supplement: d2cy00114d1.pdf [file d2cy00114d1.pdf]

**Promotional effect of Sn additive on the chlorine resistance over SnMnOx/LDO  
catalysts for synergistic decomposition of NOx and *o*-DCB**

Jiaqing Wang<sup>a</sup>, Yi Xing<sup>a,b</sup>, Wei Su<sup>a,b,\*</sup>, Kongzhai Li<sup>c</sup>, Zhiliang Ma<sup>d</sup>, Wenbo Zhang<sup>a</sup>,

Hui Zhang<sup>a</sup>

<sup>a</sup> School of Energy and Environmental Engineering, University of Science and  
Technology Beijing, Beijing, 100083, China

<sup>b</sup> State Key Laboratory of Advanced Metallurgy, University of Science and Technology  
Beijing, Beijing, 100083, China

<sup>c</sup> State Key Laboratory of Complex Nonferrous Metal Resources Clean Utilization  
Engineering, Kunming University of Science and Technology, Kunming, 650093,  
China

<sup>d</sup> Tianjin Water Engineering Co., LTD, Tianjin, 300222, China

\*Corresponding author.

E-mails address: [suwei@ustb.edu.cn](mailto:suwei@ustb.edu.cn) (W. Su)

**Contents**

1. Supplementary Figures

2. Supplementary Tables

## 1. Supplementary Figures

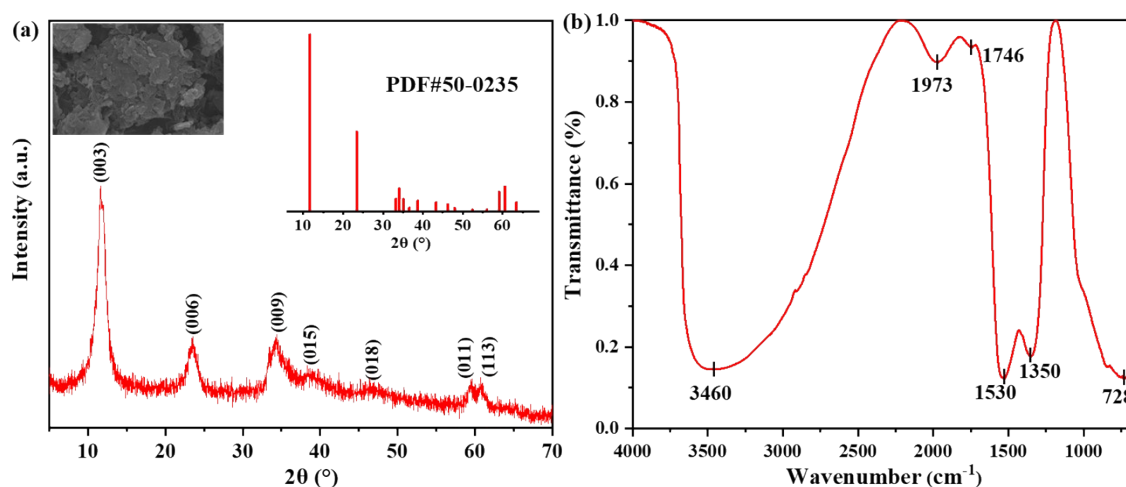

**Fig. S1.** (a) XRD pattern and SEM image (inset) of CoFe-LDH precursors, (b) FTIR spectrum of CoFe-LDH precursors.

The CoFe-LDH precursors were characterized by XRD, SEM and FTIR to determine the successful synthesis of hydrotalcite-like structures, and the results are presented in **Fig. S1**. The XRD pattern of the sample are consistent with that of the standard card (PDF# 50-0235), and the bands at 11.6, 23.4, 34.3, 38.7, 46.3, 59.6 and 60.8° are attributed to the characteristic peaks of CoFe-LDH<sup>1</sup>. The SEM image shows that CoFe-LDH is stacked in unevenly sized lamellae, which conforms to the characteristics of hydrotalcite-like structure morphology<sup>1</sup>. In **Fig. S1(b)**, the broad absorption peak at 3460  $\text{cm}^{-1}$  corresponds to the stretching vibration of hydroxyl groups from hydroxide and interlayer water molecules<sup>2</sup>. The peak observed at 1530  $\text{cm}^{-1}$  belongs to the angular deformation vibration of  $\text{H}_2\text{O}$  molecules, and the peak at 1350  $\text{cm}^{-1}$  is ascribed to the C-O antisymmetric stretching vibration of carbonate ions<sup>3</sup>. The adsorption band around 728  $\text{cm}^{-1}$  are attributed to the vibrations of the M-O bond (M-OH, M-O-M or O-M-O)<sup>4</sup>. The results above confirmed the successful synthesis of the CoFe-LDH precursors.

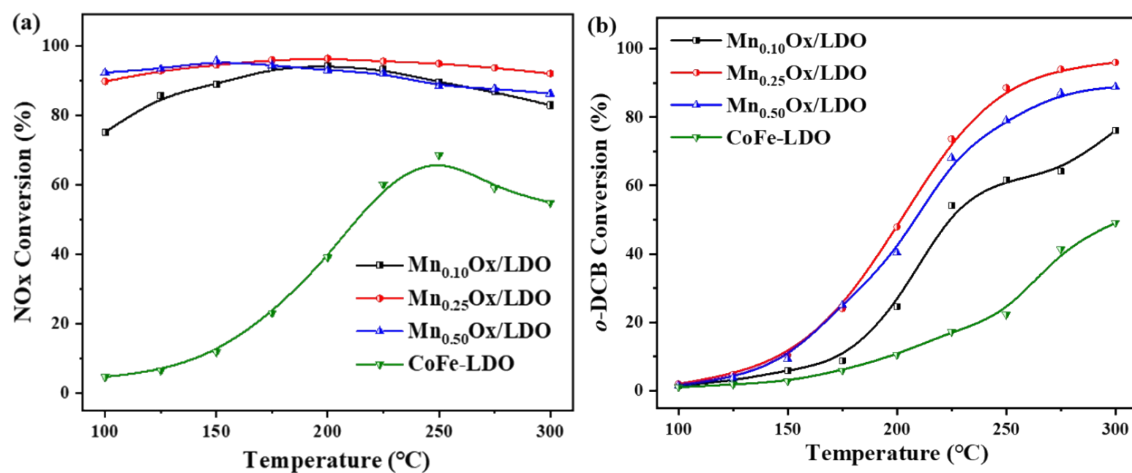

**Fig. S2.** Catalytic activities of Mn<sub>b</sub>Ox/LDO with different Mn mass loading and CoFe-LDO, (a) NO<sub>x</sub> conversion and (b) *o*-DCB conversion.

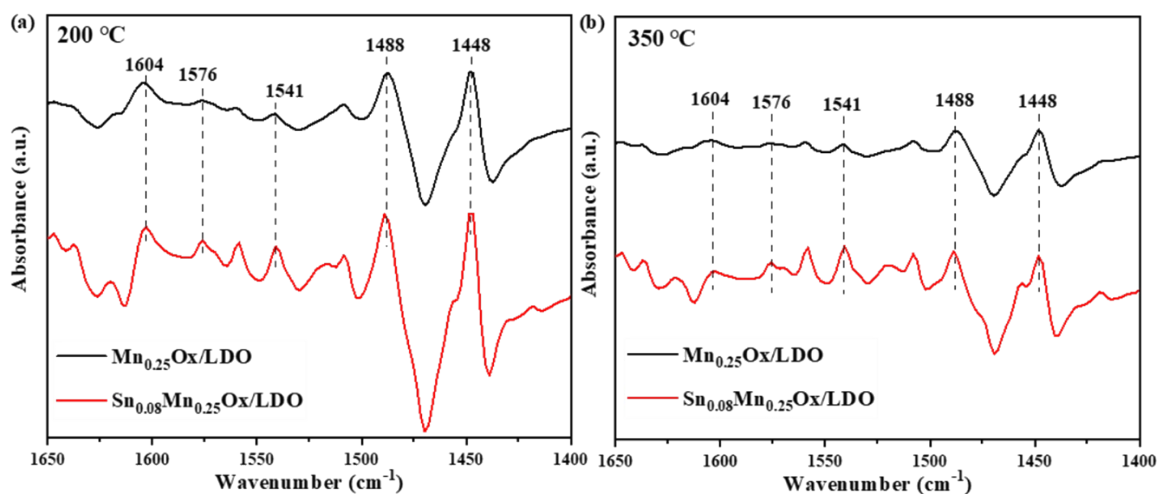

**Fig. S3.** FTIR spectra of pyridine adsorbed on the surface of Mn<sub>0.25</sub>Ox/LDO and Sn<sub>0.08</sub>Mn<sub>0.25</sub>Ox/LDO catalysts at (a) 200 °C and (b) 350 °C.

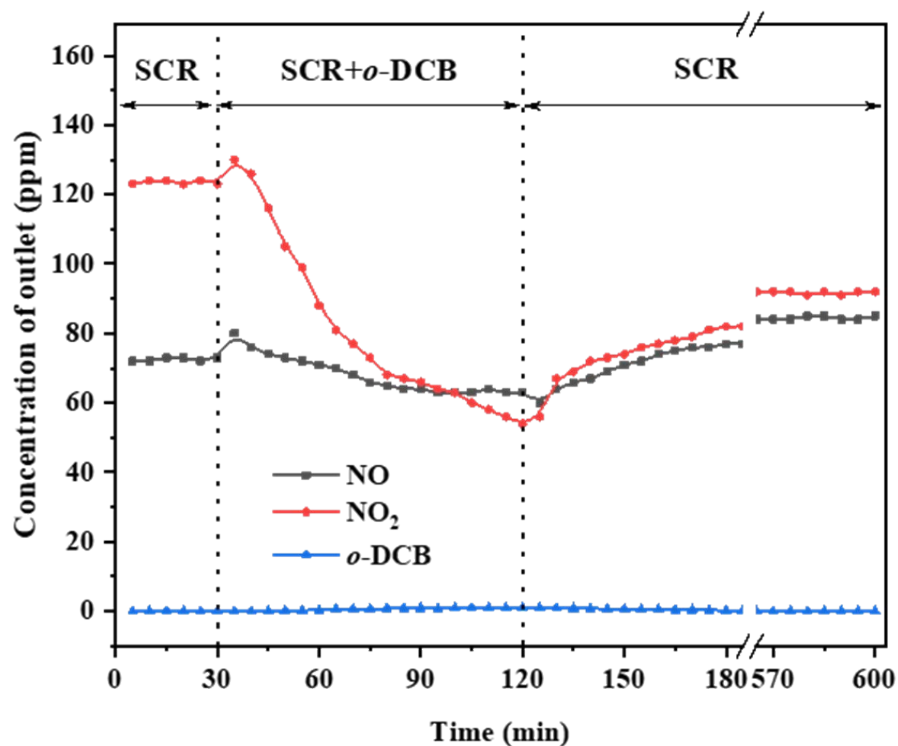

**Fig. S4.** Transient reaction on  $\text{Sn}_{0.08}\text{Mn}_{0.25}\text{Ox/LDO}$  catalyst at 300 °C for the effect of *o*-DCB on the SCR reaction.

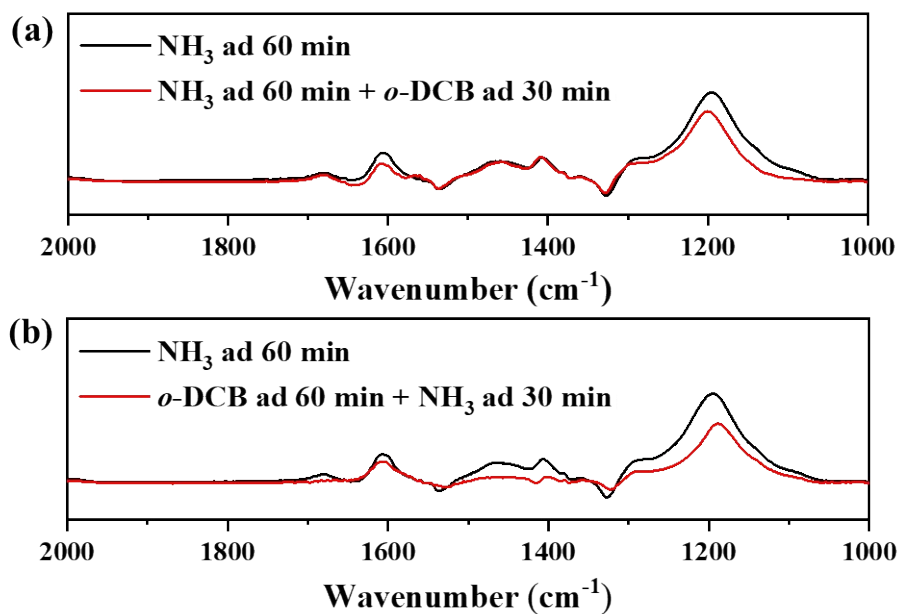

**Fig. S5.** In situ DRIFTS spectra of (a)  $\text{NH}_3$  adsorption at 60 min and pre-adsorbed  $\text{NH}_3$  + *o*-DCB adsorption at 30 min, (b)  $\text{NH}_3$  adsorption at 60 min and pre-adsorbed *o*-DCB +  $\text{NH}_3$  adsorption at 30 min.

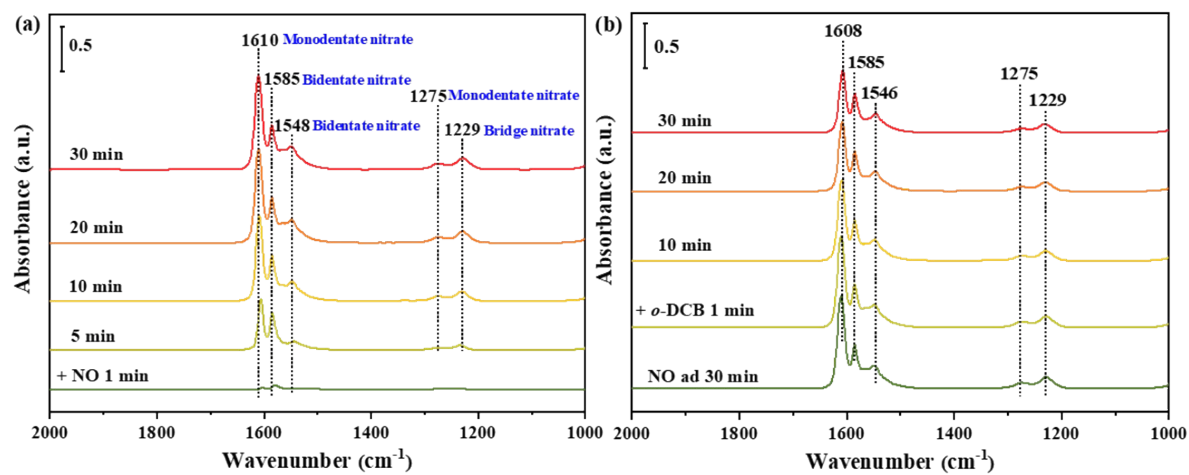

**Fig. S6.** In situ DRIFTS spectra of  $\text{Sn}_{0.08}\text{Mn}_{0.25}\text{Ox/LDO}$  catalyst exposed to (a) NO and (b) followed by exposure to *o*-DCB for various time at 150 °C.

## 2. Supplementary Tables

**Table S1.** Quantitative results of the O<sub>2</sub>-TPD, H<sub>2</sub>-TPR, NH<sub>3</sub>-TPD and Py-FTIR.

| Catalysts                                          | Amount of O <sub>2</sub><br>desorption<br>(mmol/g) | H <sub>2</sub><br>consumption<br>(mmol/g) | Amount of NH <sub>3</sub><br>desorption<br>(mmol/g) | The ratios of<br>B/L <sup>a</sup> |        |
|----------------------------------------------------|----------------------------------------------------|-------------------------------------------|-----------------------------------------------------|-----------------------------------|--------|
|                                                    |                                                    |                                           |                                                     | 200 °C                            | 350 °C |
| Fresh-Mn <sub>0.25</sub> Ox/LDO                    | 0.34                                               | 0.72                                      | 0.79                                                | 0.08                              | 0.10   |
| Used-Mn <sub>0.25</sub> Ox/LDO                     | /                                                  | 0.78                                      | 1.89                                                | /                                 |        |
| Fresh-Sn <sub>0.08</sub> Mn <sub>0.25</sub> Ox/LDO | 0.36                                               | 0.72                                      | 1.29                                                | 0.17                              | 0.29   |
| Used-Sn <sub>0.08</sub> Mn <sub>0.25</sub> Ox/LDO  | /                                                  | 0.73                                      | 1.43                                                | /                                 |        |
| CoFe-LDO                                           | 0.45                                               | 0.88                                      | 0.85                                                | /                                 |        |

<sup>a</sup> Calculated from Py-FTIR data.

## Reference

1. H. Lu, M. Sui, B. Yuan, J. Wang and Y. Lv, *Chemical Engineering Journal*, 2019, **357**, 140-149.
2. X. Wu, C. Ci, Y. Du, X. Liu, X. Li and X. Xie, *Materials Chemistry and Physics*, 2018, **211**, 72-78.
3. Q. Yan, Y. Nie, R. Yang, Y. Cui, D. O'Hare and Q. Wang, *Applied Catalysis A: General*, 2017, **538**, 37-50.
4. J. Wang, Z. Lei, H. Qin, L. Zhang and F. Li, *Industrial & Engineering Chemistry Research*, 2011, **50**, 7120-7128.
